# Supplementary figures and images for: Spectral Investigation and In Vitro Antibacterial Evaluation of Ni II and Cu II Complexes of Schiff Base Derived from Amoxicillin and α ‐Formylthiophene ( α ft)
Source: Hindawi journal article supplement (doi:10.1155/2015/136285), 2015-01-01

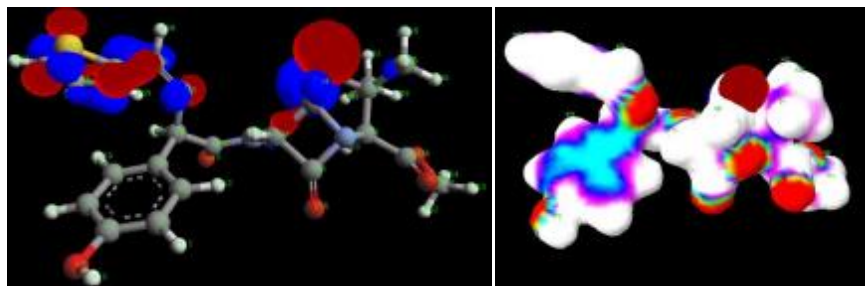

Graphical Abstract: HOMO-LUMO structure and ESP mapped density of Ligand (HL)

Supplement: f1 [file 136285.f1.pdf]
